# Supplementary material
Source: PubMed Central journal article supplement (PMC3420212)
Supplement: 1117982109_pnas.201117982SI.pdf [file 1117982109_pnas.201117982SI.pdf]

# Supporting Information

Xia et al. 10.1073/pnas.1117982109

## SI Materials and Methods

**Manual Large-Scale Genotyping of Soybean Seeds.** The tissue (cotyledon) was obtained by drilling a hole in the seed surface without damaging the embryonic axis. The initially drilled material was discarded to eliminate contamination from the seed coat. Collected materials were then transferred into wells in a 384-well plate. The drill and tube were cleaned using compressed air. Subsequent DNA extraction, PCR, and electrophoresis were performed following standard protocols.

**Screening and Sequence Data for BAC Clones.** Three-dimensional screening, contig development, and BAC sequencing were performed as described previously (1). Sequence data for the related BAC clones (Fig. S2) were deposited in the DNA Data Base in Japan with the accession nos. AP011817 (WBb10K2), AP011820 (WBb220D5), AP011823 (WBb55K17), AP011818 (WBb120K2), AP011819 (WBb20D6), AP011815 (MiB63F7), AP011814 (MiB42G1), AP011816 (MiB93E8), and AP011812 (MiB309A12). All marker positions and physical distances shown in Fig. 2 were based on the contig information obtained in this study.

**Southern Hybridization.** To confirm the existence of two paralogs of *E1* in the soybean genome and deletion of *E1* in cultivars with the *e1-nl* genotype, we selected *Ban*II and *Ban*II+*Eco*RV restriction enzymes based on sequence analysis of proximate regions where *E1* and its two paralogues reside. We also included *Eco*RV to confirm whether two bands were present, as we predicted that two fragments containing *E1* or its paralogue after digestion would be of the same size. To evaluate the effect of transgene copy number, we performed Southern hybridization by using *sGFP* and *E1* probes amplified with the primers *sGFP* and *TI*, respectively (Table S4). We used a standard Southern hybridization protocol with the AlkPhos Direct Labeling and Detection System (GE Healthcare Japan).

**Screening and Characterization of Ethylmethanesulfonate-Derived Mutations.** Dry seeds of OLERICHI50 (PI643976), derived from the cultivar Bay, were soaked in a 0.35% (wt/vol) ethylmethanesulfonate (EMS) solution for 12 h, and then rinsed in tap water for 8 h. M2 seeds were obtained from self-pollinated M1 plants. For Fukuyutaka (JP29688) mutagenesis, some M2 seeds were retreated with EMS and the resultant M2 seeds were referred to as M2-2. The EMS treatments were performed as described earlier. Green leaves were harvested from 3,360 (OLERICHI50), 3,331 (Fukuyutaka M2), and 3,895 (Fukuyutaka M2-2) individual M2 plants for DNA preparation. Genomic DNAs were extracted using the cetyltrimethylammonium bromide method and purified using diatomaceous earth columns. Pooled DNAs from five to eight individuals were used for mutant screening. We performed Targeting Induced Local Lesions IN Genomes screening as described previously (2), except that we used 2% (wt/vol) agarose gel to separate *CEL* I-digested DNA fragments stained with GelRed (Biotium). Primers used for the Targeting Induced Local Lesions IN Genomes screening were GmE1-5'-F1 (5'-GACAAAACCTGAACCTCAAATT-3') and GmE1-3'-R1 (5'-AAGGATTTCA-TAAGATACAACATT-3'). The PCR using *Pfu* DNA polymerase consisted of 40 cycles at 95 °C for 30 s, 55 °C for 30 s, and 72 °C for 1 min, without initial denaturation or final extension. *CEL* I was purified from celery stalks, as described previously (3).

For phenotypic characterization of the three *E1* mutant lines, we first evaluated phenotypic segregation for flowering time in *F*<sub>2</sub> populations derived from a cross between homozygous *e1-m1*

plants and WT OLERICHI50. The *F*<sub>2</sub> population (96 plants) was grown in a greenhouse with a 15 h light/9 h dark photoperiod extended with metal halide lamps for 30 d after sowing; thereafter, we used a 14 h light/10 h dark photoperiod. The allelic information was acquired by direct sequencing of fragments amplified by using the primer pair 5'-CCGTTTGATTGGTTT-TTGGT-3' (forward) and 5'-AACAAGCGATGAAGGGAAA-A-3' (reverse) and sequenced using the primers 5'-CCCTTC-AGTTTCTGCAGCTC-3' or 5'-AACCGTGCATAGATCTCC-TGCTA-3'. We selected 12 representative plants per genotype for subsequent analysis. For other mutations, we grew offspring of the heterozygous genotypes (*E1/e1-m2* or *E1/e1-m3*) or the homozygous genotypes (*e1-m2/e1-m2* or *e1-m3/e1-m3*) for *e1-m2* and *e1-m3*, along with the original WT cultivar Fukuyutaka as a control, and evaluated their flowering phenotypes under natural day-length conditions. Genotypes were identified by direct sequencing.

**Alignment and Phylogenetic Analysis.** We searched for expressed sequence tags using the Computational Biology and Functional Genomics Laboratory database (<http://compbio.dfci.harvard.edu/tgi/cgi-bin/tgi/Blast/index.cgi>). *E1* homologues were also identified using BLASTP searches against *Lotus japonicus* ([www.kazusa.or.jp/lotus](http://www.kazusa.or.jp/lotus)) and other species (<http://www.phytozome.net>) with  $E < 10^{-5}$ . Glyma06g23040.1 (corresponding to *E1*), two paralogues Glyma04g24640.1 and Glyma18g22670.1 (corresponding to Gm18g22670), and other homologous protein sequences were retrieved from the gene family encoding a domain of unknown function (DUF313) at the Angiosperm node (<http://www.phytozome.net>, version 8.0). First, from this DUF313 family, the sequences with high homology to *E1* were selected. Second, some randomly selected angiosperm species were included for analysis as a result of the large size of this gene family. For each selected species, the gene most homologous to *E1* was chosen. As some members of a gene family were annotated as having a B3 domain, we added several well characterized B3 domain sequences as well as their homologues in soybean for the alignment and phylogenetic analysis. Sequences were first aligned by using Clustal X2 (4), with default parameter values (protein weight matrix using the Gonnet Series with a gap penalty of 10.00, a gap length penalty of 0.20, and a delay-divergent cutoff of 30%). The central alignments corresponding to the *E1* protein sequence were curated, and were realigned by using Clustal X2 with the default parameter values. Thereafter, phylogenetic analysis was performed using MEGA4, with the neighbor-joining method and 1,000 bootstrap iterations (5). The alignment of the *E1* protein with other highly homologous sequences from *Phaseolus vulgaris*, *Medicago truncatula*, and *L. japonicus* is shown in Fig. 3A. The condensed tree with a cutoff value of 40% is shown in Fig. 3B.

**RNA Preparation and Quantitative PCR.** Plants were grown in growth chambers with normal cool white lamps (MLRBOC400FU; Mitsubishi/OSRAM) with long (16 h light/8 h dark), short (12 h light/12 h dark), or intermediate (14.5 h light/9.5 h dark) day length. In the early vegetative growth stage, plants were positioned at the middle of the growth chamber with a light intensity of approximately 200  $\mu\text{mol}\cdot\text{s}^{-1}\cdot\text{m}^{-2}$ ; during the late growth stage, major functional leaves received light with a stronger intensity of approximately 270  $\mu\text{mol}\cdot\text{s}^{-1}\cdot\text{m}^{-2}$  because they were closer to the top of the growth chamber. All samples for RNA extraction or expression were taken from fully expanded leaves except for our analyses of tissue-specific expression. To minimize damage to the plants, each

sample was collected from the leaf margins of two plants. Total leaf RNAs were extracted using the TRIzol method (Life Technologies) and treated with DNase (Takara Bio). RNA yield and quality were examined with a NanoDrop spectrophotometer (NanoDrop Technologies). We used 1 µg of total RNA for first-strand cDNA synthesis using ReverTra Ace (Toyobo) and a standard oligo(dT20) primer according to the manufacturer's instructions. The cDNAs were then diluted threefold with PCR-grade water, and 2-µL aliquots were used as RT-PCR templates.

**Semiquantitative RT-PCR.** The PCR was performed using Ex-Taq under parameters and conditions described in Table S4. PCR products were resolved in nondenaturing polyacrylamide gel [5% (wt/vol) for stacking and 11–13% (wt/vol) for separating] were fluorescently stained with Vistra Green (GE Healthcare Japan)

(6). Band intensity on the scanned gel image semiquantitatively represented the gene expression level.

**Real-time quantitative RT-PCR.** Transcript levels were quantified using real-time quantitative RT-PCR (iCycle iQ; BioRad) using a SYBR Green SuperMix kit (BioRad). We used 2 µL of diluted cDNA in a 20-µL reaction volume. Gene expression level was quantified using the nonequal efficiencies method with *GmTubulin* as an internal control (7).

To analyze gene expression in the transgenic plants under long-day conditions (16 h light/8 h dark), samples from fully expanded leaves were taken weekly starting 2 wk after emergence. Unless otherwise indicated, leaf samples were taken exactly 4 h after the light was turned on. The growth and flowering status were observed daily.

1. Xia Z, Sato H, Watanabe S, Kawasaki S, Harada K (2005) Construction and characterization of a BAC library of soybean. *Euphytica* 141:129–137.
2. McCallum CM, Comai L, Greene EA, Henikoff S (2000) Targeting induced local lesions IN genomes (TILLING) for plant functional genomics. *Plant Physiol* 123:439–442.
3. Yang B, et al. (2000) Purification, cloning, and characterization of the CEL I nuclease. *Biochemistry* 39:3533–3541.
4. Thompson JD, Gibson TJ, Plewniak F, Jeanmougin F, Higgins DG (1997) The CLUSTAL\_X windows interface: Flexible strategies for multiple sequence alignment aided by quality analysis tools. *Nucleic Acids Res* 25:4876–4882.
5. Tamura K, Dudley J, Nei M, Kumar S (2007) MEGA4: Molecular Evolutionary Genetics Analysis (MEGA) software version 4.0. *Mol Biol Evol* 24:1596–1599.
6. Xia Z, et al. (2007) An integrated high-density linkage map of soybean with RFLP, SSR, STS, and AFLP markers using A single F2 population. *DNA Res* 14:257–269.
7. Pfaffl MW (2001) A new mathematical model for relative quantification in real-time RT-PCR. *Nucleic Acids Res* 29:e45.

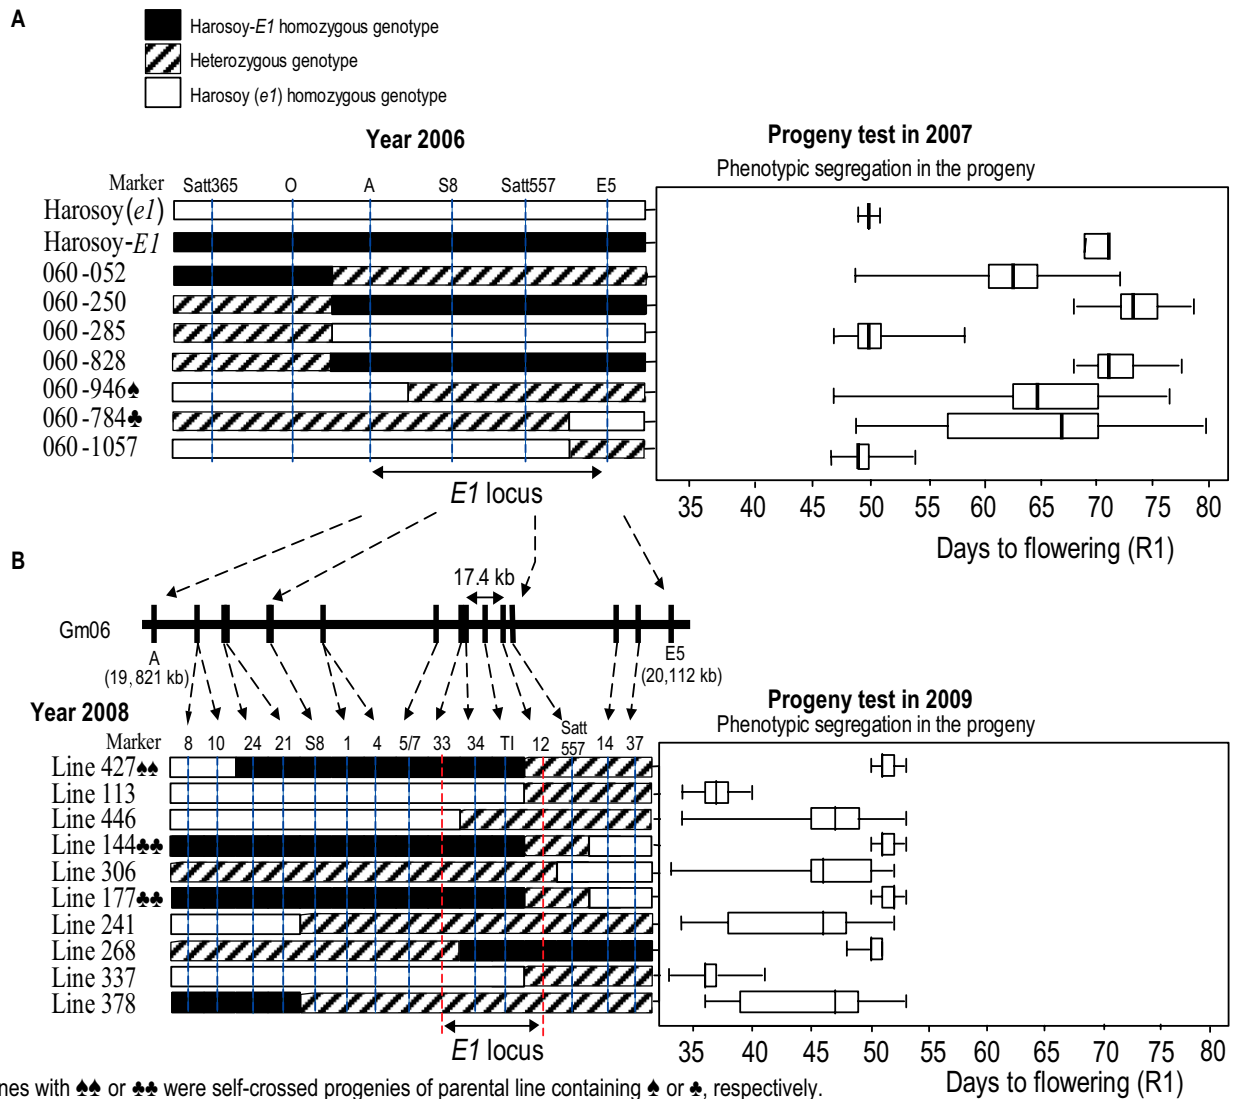

**Fig. S1.** Graphical genotypes of soybean recombinants carrying crossovers in the *E1* region in the 2006 to 2009 experiments. *Left:* Recombinants used for fine-scale mapping of the *E1* locus. *Right:* Phenotypic segregation patterns in the following year in the progenies. Recombination is shown by white bars representing Harosoy (*e1*), black bars representing Harosoy-*E1*, and cross-hatched bars representing the heterozygote. The phenotypic segregation is shown in box-plot format. The interquartile region, median, and range are indicated by the box, the bold vertical line, and the horizontal line, respectively. In 2006 to 2007, with seven recombinants, we were able to delimit the *E1* to a 289-kb region. In 2008 to 2009, with 10 recombinants, we further delimited the *E1* region to a 17.4-kb region (chromosome Gm06 in Glyma1.0; <http://www.phytozome.net/soybean>). The phenotypic parameter flowering time (R1) and the genotypes at marker TI are summarized in Table S1. The sowing dates (April 2007 and June 2009) appeared to affect the phenotypic segregation ranges, but not the segregation patterns.

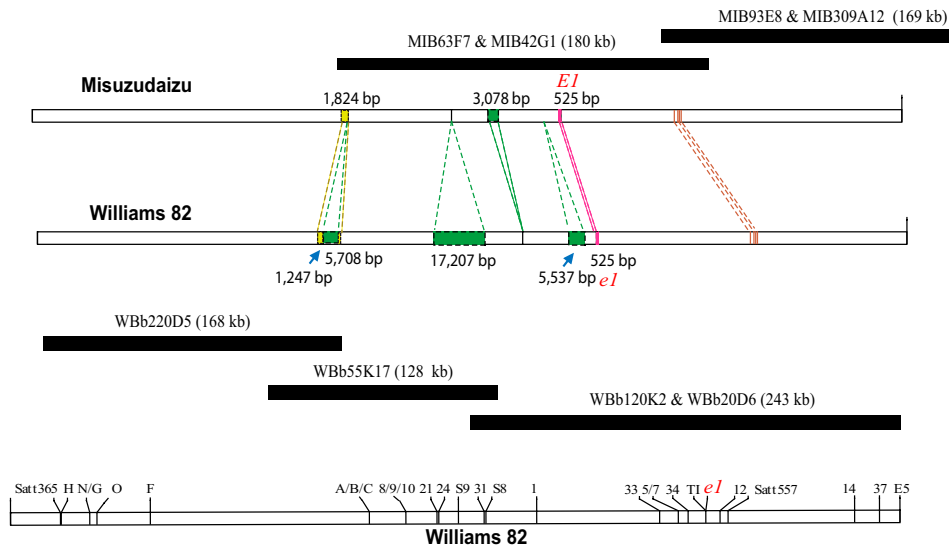

**Fig. S2.** Polymorphisms (gaps or insertion/deletions) between two contigs in the *E1* region built from BAC clones of Misuzudaizu and Williams 82. The deletions and transposed regions are marked in yellow, green, and brown, respectively. The physical positions of the markers (Table S4) used for fine-scale mapping are also shown. Black bars labeled with MIB or WBb represent BAC clones from Misuzudaizu and Williams 82, respectively. Their accession numbers are listed in *SI Materials and Methods*.

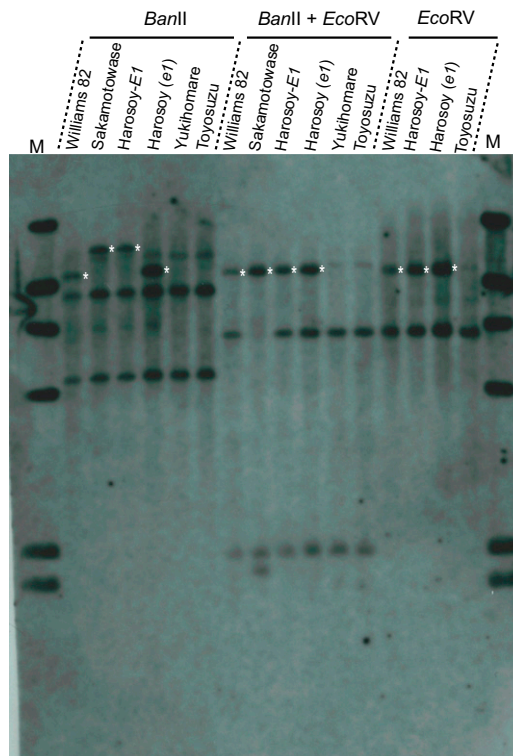

**Fig. S3.** The presence of *E1* and its two paralogues in the soybean genome were confirmed by Southern hybridization. Three copies of *E1* were present in cultivars of Williams 82 (*e1-as*), Sakamotowase (*e1-fs*), Harosoy-*E1* (*E1*), and Harosoy (*e1-as*). The bands marked with stars, which correspond to the *E1* locus, was absent in the *e1-nl* cultivars Yukihomare and Toyosuzu, indicating that a deletion occurred in the *E1*-anchored regions. Only two bands (one for Toyosuzu, *e1-nl*), were present (as predicted) using *EcoRV*, as the two fragments containing *E1* and *Gm18g22670* are of similar size. M represents the DNA molecular weight markers ( $\lambda$ HindIII).

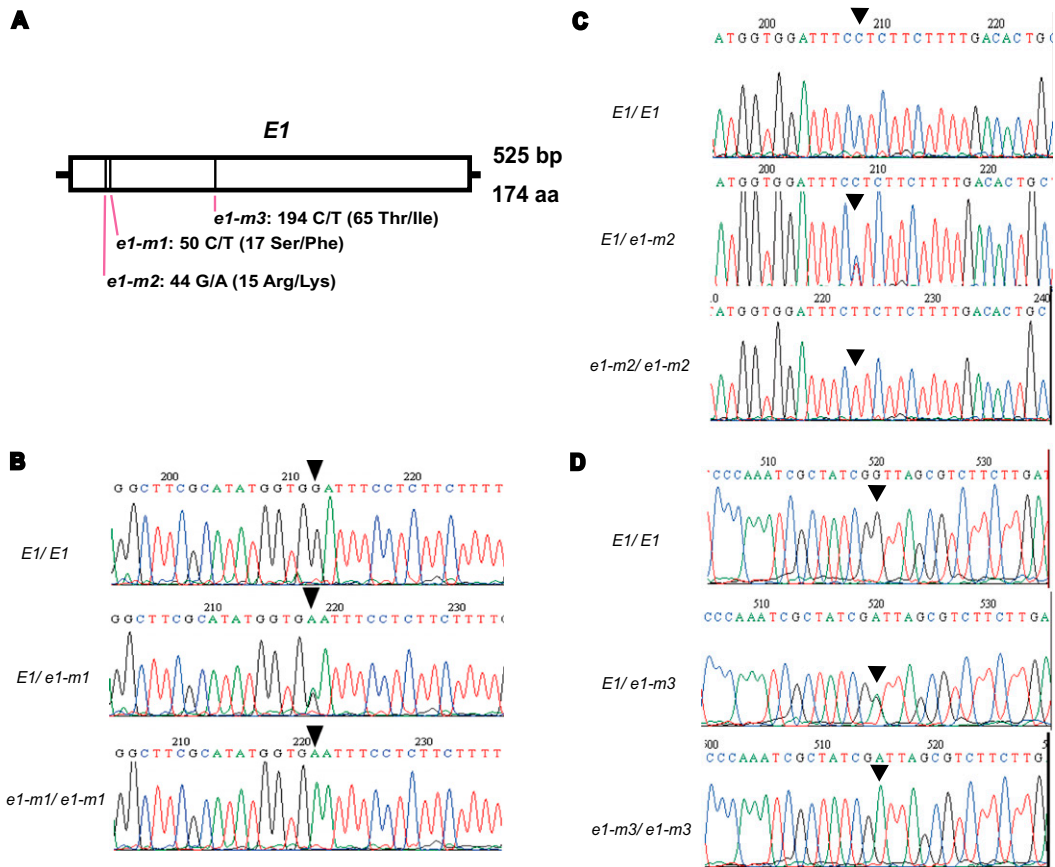

**Fig. S4.** Characterization of *E1* mutants induced by EMS. (A) Three independent mutations occurred at different position in *E1*. (B–D) Representative sequence electrograms showing the allelic variations at the mutation point (nucleotide) in F2 population derived from a cross between *e1-m1* and WT OLERICH150 (*E1*) (B), and in the progenies of from self-pollinated heterozygous genotype of *e1-m2* (C), and *e1-m3* (D) with a genetic background of Fukuyutaka (*E1*). The reverse complementary sequences are displayed in B and C. The mutation positions are marked by black triangles. Phenotypic data for each genotype are shown in Table 1.



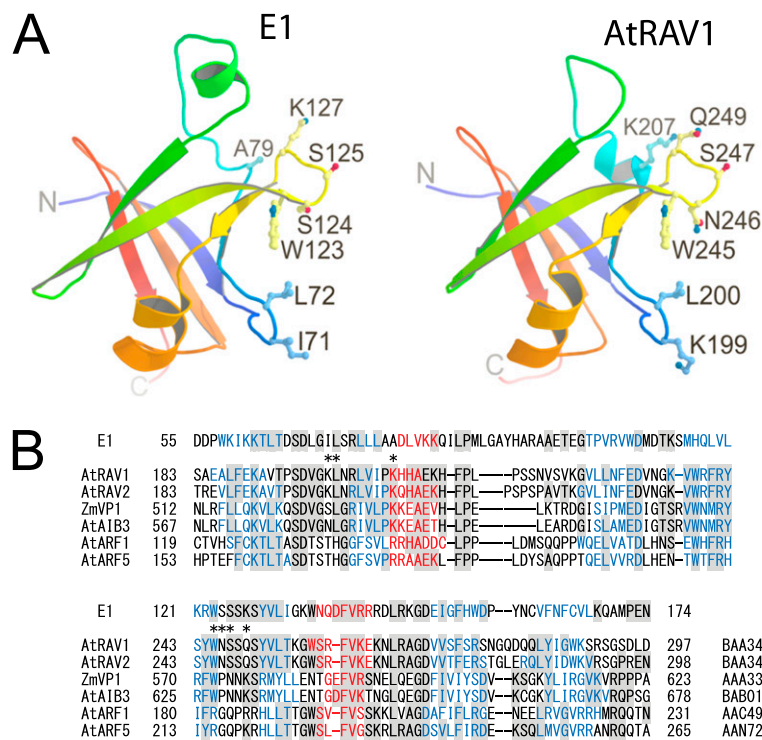

**Fig. S5.** Characterization of the B3-like domains of the E1 protein. (A) Comparison of the structural models of the B3-like domains of AtRAV1 and E1. The model was generated by using the Phyre server (<http://www.imperial.ac.uk/phyre>) based on the NMR solution structure of the B3 domain of *Arabidopsis thaliana* AtRAV1 (Protein Data Bank code 1wid). Both structures are displayed with the same orientation after 3D superimposition. The candidate residues involved in the binding of AtRAV1 to DNA, and their corresponding residues in E1, are shown in the ball-and-stick representation. (B) Structure-based sequence alignment of the B3 domains of E1. Sequences of the last six proteins (At, *A. thaliana*; Zm, *Zea mays*) were obtained from the National Center for Biotechnology Information database (<http://www.ncbi.nlm.nih.gov>) with the accession number shown at the end of each sequence. AIB3, ABCISIC ACID INSENSITIVE3; ARF, Auxin Response Factor; RAV, Related to ABI3 and VP1; VP1, VIVIPAROUS1. Letters with a gray background are residues conserved in at least two families. The amino acid residues in red and blue, respectively, correspond to secondary structural  $\alpha$ -helix and  $\beta$ -strand regions of AtRAV1 derived from its NMR solution structure, whereas those in E1 were obtained by using the Jpred3 secondary structure prediction server (<http://www.compbio.dundee.ac.uk/www-jpred>). The predicted DNA-contacting residues for AtRAV1 are indicated by asterisks above the sequences.

**Table S1. Progeny test for the recombinant lines used for fine-scale mapping of *E1***

| Line                                                                                                                                | E1 genotype               | Flowering time (R1)* in progeny (NIAS Tsukuba, Japan) |      |      |                             |
|-------------------------------------------------------------------------------------------------------------------------------------|---------------------------|-------------------------------------------------------|------|------|-----------------------------|
|                                                                                                                                     |                           | <i>n</i>                                              | Mean | SD   | <i>P</i> value <sup>†</sup> |
| Progeny test in 2007 (NIAS, Tsukuba, Japan)                                                                                         |                           |                                                       |      |      |                             |
| 060-1057                                                                                                                            | <i>e1/e1</i> <sup>‡</sup> | 77                                                    | 53.7 | 1.29 | —                           |
| 060-784                                                                                                                             | <i>E1/E1</i> <sup>‡</sup> | 148                                                   | 68.8 | 7.76 | —                           |
| 060-946                                                                                                                             | <i>E1/e1</i> <sup>‡</sup> | 106                                                   | 67.5 | 6.74 | —                           |
| 060-828                                                                                                                             | <i>E1/E1</i> <sup>‡</sup> | 96                                                    | 74.5 | 2.1  | —                           |
| 060-285                                                                                                                             | <i>e1/e1</i> <sup>‡</sup> | 118                                                   | 54.3 | 1.69 | —                           |
| 060-250                                                                                                                             | <i>E1/E1</i> <sup>‡</sup> | 127                                                   | 76.4 | 2.08 | —                           |
| 060-52                                                                                                                              | <i>E1/e1</i> <sup>‡</sup> | 108                                                   | 64.9 | 6.05 | —                           |
| Harosoy- <i>E1</i>                                                                                                                  | <i>E1/E1</i> <sup>‡</sup> | 5                                                     | 73.2 | 0.98 | —                           |
| Harosoy ( <i>e1</i> )                                                                                                               | <i>e1/e1</i> <sup>‡</sup> | 5                                                     | 54.2 | 0.63 | —                           |
| Association analysis between phenotypic parameters for flowering time (R1) and <i>E1</i> genotype determined using TI marker (2009) |                           |                                                       |      |      |                             |
| 113                                                                                                                                 | <i>e1/e1</i> <sup>§</sup> | 58                                                    | 37.1 | 1.31 | —                           |
| 144                                                                                                                                 | <i>E1/E1</i> <sup>§</sup> | 102                                                   | 51.2 | 0.67 | —                           |
| 177                                                                                                                                 | <i>E1/E1</i> <sup>§</sup> | 60                                                    | 51.6 | 0.74 | —                           |
| 241                                                                                                                                 | <i>e1/e1</i> <sup>§</sup> | 26                                                    | 36.5 | 1.18 | 6.16 × 10 <sup>-39</sup>    |
|                                                                                                                                     | <i>E1/e1</i> <sup>§</sup> | 52                                                    | 46.5 | 1.13 | —                           |
|                                                                                                                                     | <i>E1/E1</i> <sup>§</sup> | 19                                                    | 60.4 | 0.88 | —                           |
| 268                                                                                                                                 | <i>E1/E1</i> <sup>§</sup> | 57                                                    | 50.2 | 0.61 | —                           |
| 306                                                                                                                                 | <i>e1/e1</i> <sup>§</sup> | 24                                                    | 36.4 | 1.58 | 1.39 × 10 <sup>-36</sup>    |
|                                                                                                                                     | <i>E1/e1</i> <sup>§</sup> | 47                                                    | 46.5 | 1.29 | —                           |
|                                                                                                                                     | <i>E1/E1</i> <sup>§</sup> | 27                                                    | 50.3 | 1.08 | —                           |
| 337                                                                                                                                 | <i>e1/e1</i> <sup>§</sup> | 59                                                    | 36.4 | 1.58 | —                           |
| 378                                                                                                                                 | <i>e1/e1</i> <sup>§</sup> | 25                                                    | 37.5 | 0.7  | 6.10 × 10 <sup>-49</sup>    |
|                                                                                                                                     | <i>E1/e1</i> <sup>§</sup> | 50                                                    | 47.3 | 1.04 | —                           |
|                                                                                                                                     | <i>E1/E1</i> <sup>§</sup> | 22                                                    | 50.8 | 0.89 | —                           |
| 427                                                                                                                                 | <i>E1/E1</i> <sup>§</sup> | 58                                                    | 51.3 | 0.75 | —                           |
| 446                                                                                                                                 | <i>e1/e1</i> <sup>§</sup> | 21                                                    | 36.2 | 1.41 | 6.58 × 10 <sup>-32</sup>    |
|                                                                                                                                     | <i>E1/e1</i> <sup>§</sup> | 56                                                    | 46.7 | 0.96 | —                           |
|                                                                                                                                     | <i>E1/E1</i> <sup>§</sup> | 21                                                    | 50.9 | 0.87 | —                           |

NIAS, National Institute of Agrobiological Sciences.

\*Differences in R1 among different genotypes were evaluated by means of ANOVA, and a significant difference ( $P < 0.001$ ) was observed for the whole segregation data set in 2007 or in 2009.

<sup>†</sup>Differences in flowering times among different *E1* genotypes in a progeny derived from the self-pollinated heterozygous parent at the *E1* locus were analyzed by means of ANOVA.

<sup>‡</sup>Genotype at the *E1* locus determined based on the segregation pattern in the progeny.

<sup>§</sup>Genotype at the *E1* locus determined using the TI marker that was specifically designed for distinguishing between *E1* and *e1*-as.

**Table S2. Flowering time for cultivars carrying different *E* alleles**

| Cultivar or NIL                 | Accession no. | Genotype              | Flowering time (R1, days after emergence) |          |       |                                  |
|---------------------------------|---------------|-----------------------|-------------------------------------------|----------|-------|----------------------------------|
|                                 |               |                       | Growth chamber, light/dark h*             |          |       | Field <sup>†</sup> (NIAS, Japan) |
|                                 |               |                       | 12/12                                     | 14.5/9.5 | 16/8  |                                  |
| Aokimame                        | JP 28298      | <i>E1,E2,E3,E4</i>    | 31.0                                      | ND       | 106.0 | 89.6                             |
| Peking                          | JP 28432      | <i>E1,E2,E3,E4</i>    | ND                                        | 65.0     | 98.0  | 55.2                             |
| Bay                             | PI 553043     | <i>E1,E2,E3,E4</i>    | 29.5                                      | ND       | 75.0  | 60.0                             |
| Harosoy- <i>E1</i>              | PI 547676     | <i>E1,e2,E3,E4</i>    | 31.0                                      | 51.0     | 73.0  | 46.4                             |
| 1-136( <i>E1</i> ) <sup>‡</sup> | —             | <i>E1,E2,e3,E4</i>    | ND                                        | 66.0     | ND    | ND                               |
| Enrei                           | JP 28862      | <i>E1,e2,e3,E4</i>    | ND                                        | 51.0     | 71.0  | 49.0                             |
| 9L <sup>§</sup>                 | —             | <i>E1,e2,e3,E4</i>    | 29.0                                      | ND       | 58.5  | ND                               |
| Kariyutaka                      | JP 86520      | <i>E1,E2,e3,e4</i>    | ND                                        | 32.0     | 36.0  | 36.6                             |
| 130L <sup>§</sup>               | —             | <i>E1E4</i>           | ND                                        | 39.0     | ND    | ND                               |
| 130E <sup>§</sup>               | —             | <i>E1e4</i>           | ND                                        | 33.0     | ND    | ND                               |
| Clark                           | PI 617268     | <i>e1-as,E2,E3,E4</i> | ND                                        | 40.0     | 58.0  | 42.4                             |
| Williams 82                     | PI 518671     | <i>e1-as,E2,E3,E4</i> | 29.0                                      | ND       | 54.0  | 41.8                             |
| Harosoy- <i>E2</i>              | PI 547768     | <i>e1-as,E2,E3,e4</i> | 30.0                                      | ND       | 57.0  | 36.9                             |
| 1-136( <i>e1</i> ) <sup>‡</sup> | —             | <i>e1-as,E2,e3,E4</i> | ND                                        | 40.0     | ND    | ND                               |
| Harosoy                         | PI 547707     | <i>e1-as,e2,E3,E4</i> | 29.0                                      | 33.5     | 49.0  | 35.4                             |
| Harosoy- <i>e4</i>              | PI 591435     | <i>e1-as,e2,E3,e4</i> | 29.0                                      | ND       | 44.0  | 33.2                             |
| Harosoy- <i>e3</i>              | PI 547716     | <i>e1-as,e2,e3,E4</i> | 29.5                                      | ND       | 43.0  | 32.3                             |
| Sakamotowase                    | JP 27450      | <i>e1-fs,e2,e3,E4</i> | 29.0                                      | 31.0     | 30.0  | 29.7                             |
| 9E <sup>§</sup>                 | —             | <i>e1-fs,e2,e3,E4</i> | 29.0                                      | ND       | 32.0  | ND                               |
| Yukihomare                      | —             | <i>e1-nl,e2,E3,e4</i> | ND                                        | 34.0     | 36.0  | 34.9                             |
| Fiskeby V                       | JP 30465      | <i>e1-nl,e2,e3,E4</i> | 29.0                                      | ND       | 30.0  | 32.0                             |

JP, accessions from the Japanese NIAS GenBank; ND, not done; NIL, near-isogenic line; NIAS, National Institute of Agrobiological Sciences; PI, accessions from the USDA-ARS National Plant Germplasm System.

\*Phenotypic data for flowering time were collected from three or four plants in the growth chamber.

<sup>†</sup>Phenotypic data for flowering time were collected from five plants in a field under natural conditions [day length (h:min) ranging from 13:10–14:37] at NIAS.

<sup>‡</sup>NILs were derived from Misuzudaizu × Mashidouongong 503.

<sup>§</sup>NILs were derived from Miharudaizu × Sakamotowase.

**Table S3. Transcript abundance of *E1* in relation to expression level of *GmFTs*, flowering time, and copy number of *E1* in transgenic plants**

| T <sub>0</sub> line | No. of T <sub>1</sub> plants | Copy no. | <i>E1</i> expression* |      | <i>GmFT</i> expression* |      | Mean flowering time ± SD, d |
|---------------------|------------------------------|----------|-----------------------|------|-------------------------|------|-----------------------------|
|                     |                              |          | 15 d                  | 30 d | 15 d                    | 30 d |                             |
| TG2                 | 2                            | 7–8      | —                     | —    | +++                     | +++  | 24.5 ± 0.5                  |
| TG2                 | 4                            | 1–2      | +++                   | +++  | —                       | —    | ≥53.0                       |
| TG11                | 2                            | 1–2      | +++                   | +++  | —                       | —    | >70.0                       |
| TG4                 | 1                            | 3        | ++                    | +    | ±                       | ++   | 37.0                        |
| WT <sup>†</sup>     | 6                            | 0        | —                     | —    | +++                     | +++  | 29.1 ± 0.69                 |
| VC                  | 6                            | 0        | —                     | —    | +++                     | +++  | 29.4 ± 0.90                 |

VC, vector control.

\*—, ±, +, ++, and +++ represent no band or very faint, faint, intermediate, and strong bands, respectively, on the PAGE gel in semiquantitative RT-PCR analyses (*SI Materials and Methods*).

<sup>†</sup>Kariyutaka.



**Table S4. List of primers used in this study**

| Primer pair      | Application             | Forward primer (5'-3')                     |                                       | Reverse primer (5'-3') |                | Position in the contig (Williams 82) constructed in this study* |                | Position on chromosome Gm06 (Glyma 1.0) |                | Annealing temperature, °C | PCR cycles | Primer concentration, pM | Origin                                                                       |
|------------------|-------------------------|--------------------------------------------|---------------------------------------|------------------------|----------------|-----------------------------------------------------------------|----------------|-----------------------------------------|----------------|---------------------------|------------|--------------------------|------------------------------------------------------------------------------|
|                  |                         | Forward primer                             | Reverse primer                        | Forward primer         | Reverse primer | Forward primer                                                  | Reverse primer | Forward primer                          | Reverse primer |                           |            |                          |                                                                              |
| A40 <sup>1</sup> | Mapping                 | ATCCCCACTTGAACACCAA                        | TCGTGTGGCAATAAACCCAGA                 | —                      | —              | 27003                                                           | 26730          | 19387989                                | 19387817       | 58                        | 30         | 0.10                     | Present study<br><a href="http://www.soybase.org">http://www.soybase.org</a> |
| Satt365          | Mapping                 | TGCTCCCTCTGCCCCTTTTCT<br>ATTT              | GAATGATGAGTTTGATAAACAT<br>GAA TGAAGAA | —                      | —              | —                                                               | —              | 19653961                                | 19653688       | 58                        | 30         | 0.10                     |                                                                              |
| H                | Mapping                 | CACGATGCTGAGTGGACAAG                       | GGATGAGTTGATAAACATG<br>AATGA          | 27352                  | 26732          | —                                                               | —              | 19654310                                | 19653690       | 58                        | 30         | 0.10                     | Present study                                                                |
| N                | Mapping                 | GGAACTTGTGACCCCTTT                         | TCAGACTCGAACACCTTCA                   | 42794                  | 43084          | —                                                               | —              | 19669752                                | 19670042       | 58                        | 30         | 0.10                     | Present study                                                                |
| G                | Mapping                 | ATCTGGAGAAACCGTTGG                         | TGAGCTGCTGTAAATCCA                    | 43325                  | 43826          | —                                                               | —              | 19670283                                | 19670772       | 58                        | 30         | 0.10                     | Present study                                                                |
| O                | Mapping                 | GGGGATGTTTTTTGAAGG                         | TCTCAAGCCCTCAATGGACT                  | 46763                  | 47080          | —                                                               | —              | 19673709                                | 19674026       | 58                        | 30         | 0.10                     | Present study                                                                |
| F                | Mapping                 | CCCTAATCTGTCACGGTTCA                       | CFAAAAGCAACAACAATG                    | 75944                  | 75261          | —                                                               | —              | 19702890                                | 19702207       | 58                        | 30         | 0.10                     | Present study                                                                |
| A                | Mapping                 | TCCTGTAAAGATGGGACAA                        | GGCTATGCTGCTTCTCTGCT                  | 194844                 | 195474         | —                                                               | —              | 19821798                                | 19822428       | 58                        | 30         | 0.10                     | Present study                                                                |
| B                | Mapping                 | TGGCCCTGAGGAATCATAG                        | TGCAGTGAATAACACATGG                   | 196923                 | 197520         | —                                                               | —              | 19823877                                | 19824474       | 58                        | 30         | 0.10                     | Present study                                                                |
| C                | Mapping                 | ATGCTGCCAAGTGAAGAAA                        | ACAGACATGAAATCGGTGA                   | 198185                 | 198651         | —                                                               | —              | 19825139                                | 19825603       | 58                        | 30         | 0.10                     | Present study                                                                |
| 8                | Mapping                 | CCTCCATGAGTACCTGATTCC                      | CTGTTGTTGAGGTGACAAT<br>ACACA          | 214531                 | 214961         | —                                                               | —              | 19841483                                | 19841913       | 58                        | 30         | 0.10                     | Present study                                                                |
| 9                | Mapping                 | TCAGAAAATTGTGTTATGAT<br>TGA                | CGATCCAAACATCTCTCCAT                  | 214732                 | 214518         | —                                                               | —              | 19841684                                | 19841470       | 58                        | 30         | 0.10                     | Present study                                                                |
| 10               | Mapping                 | CTTGACGCTAAGTGGAAAGAA                      | GAATATCCACTGGGGATTGC                  | 217555                 | 218730         | —                                                               | —              | 19844507                                | 19845680       | 58                        | 30         | 0.10                     | Present study                                                                |
| 10               | Mapping                 | CTTGTAGCGTAAAGTGAAGGAA                     | GAATATCCACTGGGGATTGC                  | 217555                 | 218730         | —                                                               | —              | 19844507                                | 19845680       | 58                        | 30         | 0.10                     | Present study                                                                |
| 24               | Mapping                 | TGCTGTAGACACCATGCG                         | GGCAAAAAGCTCCCAATAAT                  | 231776                 | 232008         | —                                                               | —              | 19858725                                | 19858957       | 58                        | 30         | 0.10                     | Present study                                                                |
| 21               | Mapping                 | AATTGCTTCCCAATACGC                         | CCATTGTTAGAGATGCCAAC                  | 232530                 | 232679         | —                                                               | —              | 19859479                                | 19859628       | 58                        | 30         | 0.10                     | Present study                                                                |
| S9 <sup>1</sup>  | Mapping                 | CGCCTACAGTCAACCCCTC                        | TGTTGGCTTCAATCTTGT                    | 243091                 | 243471         | —                                                               | —              | 19870040                                | 19870420       | 58                        | 30         | 0.10                     | Present study                                                                |
| S8               | Mapping                 | AAITGCAAGCTGTACATGG                        | GTCACCTGTTCAAGGGATTG                  | 257416                 | 258035         | —                                                               | —              | 19884366                                | 19884985       | 58                        | 30         | 0.10                     | Present study                                                                |
| 1                | Mapping                 | ATGTTGAGACATGACCACTGC                      | CTAAAATGCAACATGAGGGTGA                | 285813                 | 286966         | —                                                               | —              | 19912763                                | 19913916       | 58                        | 30         | 0.10                     | Present study                                                                |
| 4                | Mapping                 | CTACAACTCACGAACCCAA                        | CTTCCACTAGCGTCTCAAGT                  | 288811                 | 289882         | —                                                               | —              | 19915761                                | 19916832       | 58                        | 30         | 0.10                     | Present study                                                                |
| 5                | Mapping                 | AAAGGTCAAAGGGATCTCATC                      | CTATGGAGCTTCAACGAGGA                  | 352571                 | 352848         | —                                                               | —              | 19979408                                | 19979685       | 58                        | 30         | 0.10                     | Present study                                                                |
| 7                | Mapping                 | AAAGGGATCTCAATCA                           | GCAAAAACATGGCTCCAATC                  | 352779                 | 352779         | —                                                               | —              | 19979415                                | 19979616       | 58                        | 30         | 0.10                     | Present study                                                                |
| 33               | Mapping                 | TTTTCACTGACACCAAGGTC                       | ACCTGCCAAAAGTACCAATC                  | 362769                 | 362931         | —                                                               | —              | 19989677                                | 19989839       | 58                        | 30         | 0.10                     | Present study                                                                |
| 34               | Mapping                 | ACTTGGCATCAGGATAATCGAC                     | GTCCCACTCGAAGTCAATTTGAA               | 368170                 | 373985         | —                                                               | —              | 19995078                                | 20003292       | 58                        | 30         | 0.10                     | Present study                                                                |
| Tt <sup>1</sup>  | Mapping/<br>sequencing  | TCAGATGAAAGGAGCAGT<br>GTCAAAAAGAAAT<br>GTC | TCCGATCTCATCACCTTCC                   | 377835                 | 378259         | —                                                               | —              | 20007142                                | 20007566       | 58                        | 30         | 0.10                     | Present study                                                                |
| U                | Sequencing <sup>8</sup> | TTGGCTATGTTGGTGCATA                        | —                                     | 378081                 | —              | —                                                               | —              | 20007388                                | —              | —                         | —          | —                        | Present study                                                                |
| 3                | Sequencing              | ACTTGAACCTTGGAGGATTCA                      | —                                     | 379402                 | —              | —                                                               | —              | 20008709                                | —              | —                         | —          | —                        | Present study                                                                |
| 12               | Mapping                 | ATTCGAGTCTCTCGTATT                         | TTGTACAGACACAGGGGAAAG                 | 385412                 | 385623         | —                                                               | —              | 20014395                                | 20014606       | 58                        | 30         | 0.10                     | Present study                                                                |
| Satt557          | Mapping                 | CGGGATCCACCATGTAAT<br>ATGTG                | GCGCACTAACCCCTTTAITGAA                | 389763                 | 389946         | —                                                               | —              | 20018746                                | 20018929       | 58                        | 30         | 0.10                     | <a href="http://www.soybase.org">http://www.soybase.org</a>                  |
| 14               | Mapping                 | GGCTGATGAGTTGGGTAAA                        | GGGACATTACATAGTCAACAA<br>AAA          | 458434                 | 458618         | —                                                               | —              | 20087417                                | 20087601       | 58                        | 30         | 0.10                     | Present study                                                                |
| 37               | Mapping                 | TGAGACATTTAGCGCGAAT                        | CTGCTGCCATTAAATCAATCA                 | 471975                 | 472194         | —                                                               | —              | 20100955                                | 20101174       | 58                        | 30         | 0.10                     | Present study                                                                |
| E5               | Mapping                 | GAA TAG CTG AGG CCA TCC AA                 | GCC AAC AGA GAG ATC AGC AA            | 483403                 | 483021         | —                                                               | —              | 20112383                                | 20112001       | 58                        | 30         | 0.10                     | Present study                                                                |
| A32              | Mapping                 | ATCCGGTGGAGGAGCATTAT                       | AACGGCTCTGTCACAATCAA                  | —                      | —              | —                                                               | —              | 20381118                                | 20380964       | 58                        | 30         | 0.10                     | Present study                                                                |
| A29              | Mapping                 | GGGATGGAGCAATAATCAA                        | GAGTCTGAGTAAACGGCAAA                  | —                      | —              | —                                                               | —              | 20639370                                | —              | 58                        | 30         | 0.10                     | Present study                                                                |
| A21 <sup>1</sup> | Mapping                 | AACCGAATGCAAGTTGGAG                        | GGATTTGACCAACATGGAAAC                 | —                      | —              | —                                                               | —              | 20642878                                | 20642651       | 58                        | 30         | 0.10                     | Present study                                                                |
| A28              | Mapping                 | CTCGTTGCAAAGTCTGTTG                        | CGGCCACTAAATGCAAAAAT                  | —                      | —              | —                                                               | —              | 20902344                                | 20902601       | 58                        | 30         | 0.10                     | Present study                                                                |
| Satt489          | Mapping                 | GGGTGTCTCTCTCTCTAGA<br>CTGACT              | GCGTACTACTTACCCCTGTTGT<br>CTAAAA      | —                      | —              | —                                                               | —              | 23874546                                | 23874314       | 58                        | 30         | 0.10                     | <a href="http://www.soybase.org">http://www.soybase.org</a>                  |
| Satt289          | Mapping                 | GCGCCCAAGTTTTAAAAGT                        | CTGCCCATCACTAGCCCTCTT                 | —                      | —              | —                                                               | —              | 27585996                                | 27545782       | 58                        | 30         | 0.10                     | Present study                                                                |
